# Supplementary material for: Inhibiting Microglia‐Derived NLRP3 Alleviates Subependymal Edema and Cognitive Dysfunction in Posthemorrhagic Hydrocephalus after Intracerebral Hemorrhage via AMPK/Beclin‐1 Pathway
Source: Hindawi journal article supplement (doi:10.1155/2022/4177317), 2022-01-01
Supplement: f1 [file 4177317.f1.pdf]

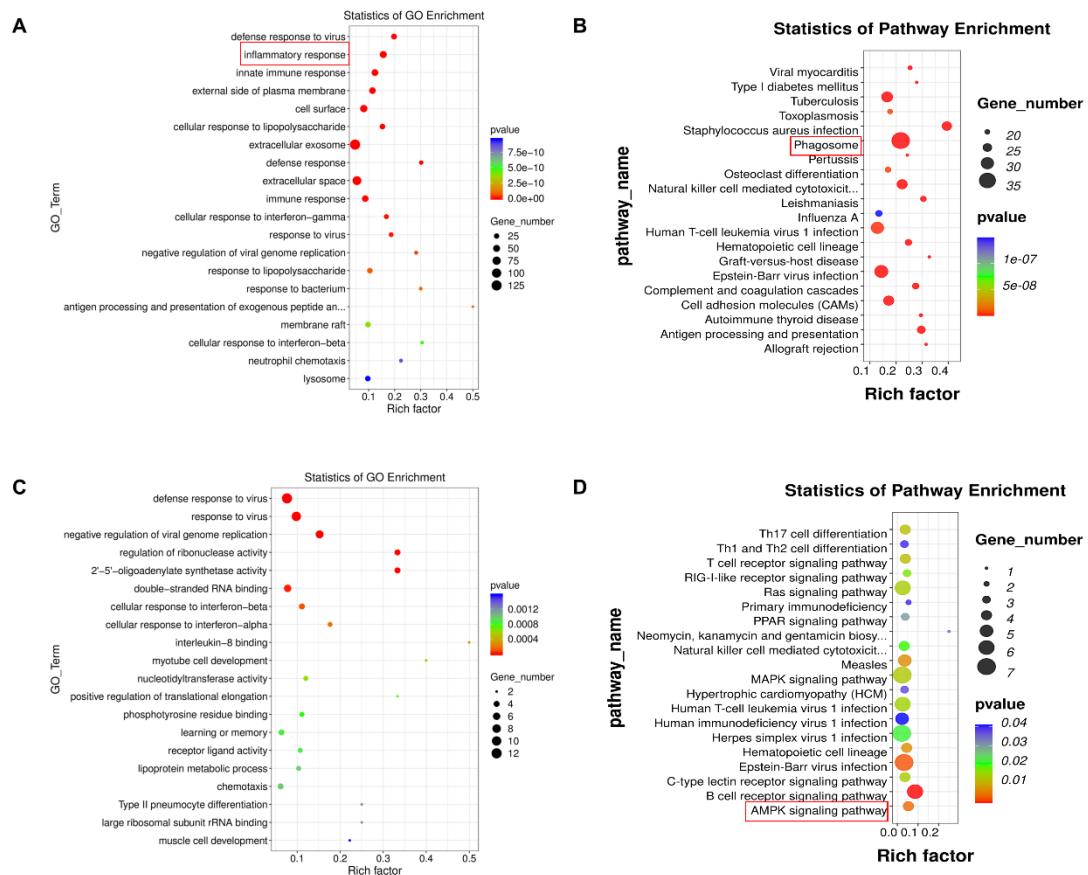

**Figure S1. GO and KEEG enrichment results according to transcriptional analysis.**

(A and C) GO enrichment showed different expression genes clustered into cellular function after ICH-IVH and MCC950 treatment in SVZ. (B and D) KEEG enrichment clustered different expression genes into respective pathways.
